# Supplementary material
Source: PubMed Central journal article supplement (PMC520941)
Supplement: plntcell_tpc.104.023150_2.pdf [file plntcell_tpc.104.023150_2.pdf]

# $\Phi$ -X-Basic- $X_2$ -pS- $X_3$ - $\Phi$ CDPK and SNF1-like

Bachmann et al. 1996, Huber and Huber, 1996; Huang and Huber, 2001; Weekes et al., 1993

full motif

V V D R G E S K N G V C A  
S V Q R Q N S E N V L I D  
P V T R L D S D A G A L F

At3g07020 UDP-glucose:sterol glucosyltransferase  
At5g61740 ABC transporter ATH14  
At5g41800 put. proline transporter

W G R R S G S W D V A A T  
S K E K R L S F V R A W E  
E H R R S R S E E N I N L  
A P S R V G S G M I V A I  
H F S K S A S P A S V I K  
E S G K S Y S L P E I L R  
S S R R R Q S S E I V P E  
A T P R V S T P E I L T P

At4g24630 DHC-type zinc finger domain-containing protein  
At3g61260 remorin  
At3g26490 unknown protein; cont. NPH3 dom  
At4g35600 kinase group RLCK VII  
At2g02480 DNAPol III gamma-like  
At3g56930 DHC-type zinc finger domain-cont. protein  
At2g16250 RLK (11 LRRs)  
At1g47670 put. Lys/His transporter

partial motif

R V E R S D S F A S E I I  
K A S K K Q S D S E E T S  
V L E R L D S D L Q K L E  
P L P R G G S G P L N G F  
K I W R D G S Y D F W T D  
S L R R R H S A G R S S R  
S V D H G S S N N N G T S  
T A G H H Y T V

At3g53380 RLK L-lectin group  
At1g57700 cdc2-related kinase  
At4g02710 sim. to chromosome condensation ATPases  
At2g46920 PP2C  
At1g78610 putative mechanosensitive ion channel  
At2g41705 cont. CRCB-like domain  
At3g17420 kinase group TAKL  
At2g18960 H<sup>+</sup>-ATPase 1, plasma membrane-type (AHA 1)

V M L D V Y S P D R L A G  
Q L P C R V S T S D V D  
V A M G R M S R D S A A E  
N A T G R M S G N L A S A  
N V P V S Y S G N G I P T  
N L R A D E S P E K V T V  
F I S P F P S D R F V S P  
R L T F L I T N K I M K M  
A L V S G D S Y R G V S G  
R V S S G E S R G T A S A  
S L G S F R S A A N V

At5g10020 RLK group LRR III (no LRR)  
At1g80830 NRAMP metal ion transporter 1 (NRAMP1)  
At1g59870 ABC transporter family protein (PDR8)  
At1g78880 expressed protein  
At2g32450 put. OC1cNAc transferase  
At3g25070 RIN 4  
At2g35350 PP2C  
At2g02490 hydroxyproline-rich protein-related  
AT4g00340 RLK group SD-2  
multiple kinase group TAKL (At1g01540 or At4g01330)  
multiple plasma membrane intrinsic protein 2 (a,b or c)

# Basic-X<sub>2</sub>-Basic-X<sub>2</sub>-pS SNF1-like

McMichael et al., 1995

|                           |           |                                                       |
|---------------------------|-----------|-------------------------------------------------------|
| H G E R T D S Q D R E A Y | At1g18670 | cdc2-related kinase                                   |
| H F S K S A S P A S V I K | At2g02480 | DNAPol III gamma-like                                 |
| K A S K K Q S D S E E T S | At1g57700 | cdc2-related kinase                                   |
| R V E R S D S F A S E I I | At3g53380 | RLK L-lectin group                                    |
| K I W R D G S Y D F W T D | At1g78610 | putative mechanosensitive ion channel                 |
| K S E H A D S D S D T F Y | At5g57110 | Ca ATPase isoform 8 (ACA 8)                           |
| K Q D N S G T E S D A D D | At5g43310 | expressed protein; sim. to COP1-interacting protein 7 |
| R T E H R R S R S E E N I | At3g26490 | unknown protein; cont. NPH3 dom                       |
| R N S Q N L S S S P D R D | At3g25500 | formin homology 2 (FH2) domain-containing protein     |

# (P-9 to -6 Basic)-Φ-X<sub>4</sub>-pS-X-Basic CDPK

Huang et al., 2001

|                                   |           |                                            |
|-----------------------------------|-----------|--------------------------------------------|
| P G R R R G G D V E S G K S E H A | At5g57110 | Ca ATPase isoform 8 (ACA 8)                |
| T N A D K S S D R N S G K M M S Y | At3g59110 | kinase group TAKL                          |
| S L R R R H S A G R S S R L S A D | At2g41705 | cont. CRCB-like domain                     |
| H Q S A R L T F L I T N K I M K M | At2g02490 | hydroxyproline-rich protein-related        |
| A E E Q K M S S I E S F K Q S S L | At2g47000 | P-glycoprotein, putative MDR4              |
| M N D L L S G S F K T S V A       | At3g52400 | syntaxin SYP122                            |
| R G S W N A A I F G S W R Q S A S | At2g16250 | RLK (11 LRRs)                              |
| S T D E Q K L S M E S M K R S S L | At3g62150 | multidrug resistance P-glycoprotein MDR17  |
| K Q E K K N T G P V S T Q A A S E | At5g05170 | CesA3 cellulose synthase catalytic subunit |

# Other [R,K]-x-x-pS

# CaM /(PKA)-like sites

|   |   |   |   |   |   |   |   |   |   |   |   |   |                  |                                                                 |
|---|---|---|---|---|---|---|---|---|---|---|---|---|------------------|-----------------------------------------------------------------|
| F | Q | E | R | E | E | S | R | D | S | D | D | D | <b>At2g27090</b> | putative bZIP                                                   |
| P | S | E | R | H | K | S | F | D | D | D | D | S | <b>At3g14350</b> | RLK group LRR V (6 LRRs)                                        |
| P | P | Q | K | E | D | S | N | S | D | Y | D | Y | <b>At4g18760</b> | LRR family                                                      |
| P | K | M | R | S | H | S | G | S | D | Y | M | Y | <b>At5g38560</b> | RLK group PERKL                                                 |
| H | G | E | R | T | D | S | Q | D | R | E | A | Y | <b>At1g18670</b> | cdc2-related kinase                                             |
| S | R | R | R | Q | S | S | E | I | V | P | E | P | <b>At2g16250</b> | RLK (11 LRRs)                                                   |
| G | S | R | R | T | Q | S | V | N | N | D | E | E | <b>At1g59870</b> | ABC transporter family protein (PDR8)                           |
| E | D | V | R | S | D | S | E | S | D | D | E | H | <b>At3g25540</b> | LAG homolog 1 (cont. TLC dom.)                                  |
| E | D | I | R | S | D | S | E | D | D | D | D |   | <b>At3g19260</b> | longevity factor-like                                           |
| C | F | R | R | D | G | S | E | S | P | S | S | E | <b>At1g25320</b> | RLK group LRR III (7 LRRs)                                      |
| E | K | R | R | S | L | S | S | S | P | P | S | T | <b>At1g59650</b> | expressed protein (CW14)                                        |
| W | G | R | K | S | G | S | W | D | M | S | P | E | <b>At3g18524</b> | DNA mismatch repair protein MSH2; cont. DHHC zinc finger domain |
| G | S | Y | R | E | L | S | E | I | A | E | Q | A | <b>At4g30190</b> | H+-ATPase 2, plasma membrane-type (AHA 2)                       |
| T | Q | S | R | L | D | S | M | S | E | S | T | T | <b>At2g48010</b> | RLK group RFK3L                                                 |
| D | G | L | R | Q | S | S | D | D | P | S | K | G | <b>At2g26730</b> | RLK group LRR III (5 LRRs)                                      |
| T | R | K | R | T | L | S | D | P | F | S | N | G | <b>At1g33990</b> | polyneuridine aldehyde esterase, putative                       |
| A | P | I | R | V | L | S | D | V | P | K | E | N | <b>At3g51850</b> | CPK 13                                                          |
| F | S | D | R | V | S | S | G | E | S | R | G | T | <b>multiple</b>  | kinase group TAKL (At1g01540 or At4g01330)                      |
| A | F | L | R | N | A | S | F | L | W | R | N | S | <b>At3g05200</b> | putative RING-H2 zinc finger protein ATL6                       |
| E | E | I | K | E | I | S | V | D | H | G | S | S | <b>At3g17420</b> | kinase group TAKL                                               |

# pS-x-[R,K]

# PKC-like sites

|   |   |   |   |   |   |   |   |   |   |   |   |   |                                |                                                                 |
|---|---|---|---|---|---|---|---|---|---|---|---|---|--------------------------------|-----------------------------------------------------------------|
| V | S | T | Q | A | A | S | E | R | G | G | V | D | <b>At5g05170</b>               | CesA3 cellulose synthase catalytic subunit                      |
| A | S | S | P | A | R | S | P | R | R | P | V | Y | <b>At1g45688</b>               | expressed protein                                               |
| P | A | V | D | P | P | S | P | R | L | S | A | F | At1g15400 or At1g80180         | expressed protein                                               |
| R | H | S | A | G | R | S | S | R | L | S | A | D | <b>At2g41705</b>               | cont. CRCB-like domain (involved in chromosome condensation?)   |
| Q | K | L | S | M | E | S | M | K | R | S | S | L | <b>At3g62150</b>               | multidrug resistance P-glycoprotein MDR17                       |
| K | M | S | S | I | E | S | F | K | Q | S | S | L | <b>At2g47000</b>               | P-glycoprotein, putative MDR4                                   |
| I | F | P | E | K | G | S | Y | R | E | L | S | E | <b>At2g18960&amp;At4g30190</b> | H <sup>+</sup> -ATPase 1&2, plasma membrane-type (AHA 2)        |
| M | T | R | L | P | G | S | F | K | E | T | S | E | <b>At1g53050</b>               | cdc2-related kinase                                             |
| A | I | K | A | L | G | S | F | R | S | N | A | T | <b>AT4g35100</b>               | plasma membrane intrinsic protein PIP3 [Arabidopsis thaliana]   |
| G | S | K | S | L | G | S | F | R | S | A | A | N | multiple                       | plasma membrane intrinsic protein 2 (a,b or c)                  |
| N | A | A | I | F | G | S | W | R | Q | S | A | S | <b>At2g16250</b>               | RLK (11 LRRs)                                                   |
| N | D | L | L | S | G | S | F | K | T | S | V | A | <b>At3g52400</b>               | syntaxin SYP122                                                 |
| E | P | D | Q | I | L | S | P | R | R | S | L | E | <b>At1g57990</b>               | put. purine permease                                            |
| S | E | S | P | R | V | S | T | K | R | D | P | V | <b>At1g78610</b>               | putative mechanosensitive ion channel                           |
| I | L | S | Q | M | L | S | Q | K | L | R | P | A | <b>At5g47910</b>               | AtrbohD respiratory burst oxidase protein D                     |
| D | I | F | S | S | G | S | R | R | T | Q | S | V | <b>At1g59870</b>               | ABC transporter family protein (PDR8)                           |
| E | H | R | V | V | F | S | D | R | V | S | S | G | multiple                       | kinase group TAKL (At1g01540 or At4g01330)                      |
| F | I | S | P | F | P | S | D | R | F | V | S | P | <b>At2g35350</b>               | PP2C                                                            |
| S | N | G | S | P | V | S | D | R | A | G | L | Q | <b>At1g23080</b>               | auxin efflux carrier, putative PIN7                             |
| A | S | A | G | S | N | S | M | K | K | T | N | S | <b>At1g78880</b>               | expressed protein                                               |
| S | S | P | T | I | Q | S | N | R | I | I | Q | T | <b>At2g01210</b>               | RLK group LRR III (7 LRRs)                                      |
| V | Q | L | N | G | I | T | F | K | V | K | Y | C | <b>At3g18524</b>               | DNA mismatch repair protein MSH2; cont. DHHC zinc finger domain |
| K | S | S | D | R | N | S | G | K | M | M | S | Y | <b>At3g59110</b>               | kinase group TAKL                                               |
| A | L | V | S | G | D | S | Y | R | G | V | S | G | <b>AT4g00340</b>               | RLK group SD-2                                                  |
| R | G | G | D | V | E | S | G | K | S | E | H | A | <b>At5g57110</b>               | Ca ATPase isoform 8 (ACA 8)                                     |
| R | L | T | F | L | I | T | N | K | I | M | K | M | <b>At2g02490</b>               | hydroxyproline-rich protein-related                             |

# [D,E]-pS-[D,E]

|   |   |   |   |   |   |   |   |   |   |   |   |   |   |
|---|---|---|---|---|---|---|---|---|---|---|---|---|---|
| D | N | S | G | T | E | S | D | A | D | D | N | H |   |
| L | G | A | A | S | D | S | D | D | N | E | D | K |   |
| S | S | S | L | S | D | S | D | D | D | K | K | S |   |
| L | R | M | G | G | D | S | D | D | D | E | E | M |   |
| I | A | E | I | G | D | T | D | E | D | E | D | D |   |
| R | E | E | S | R | D | S | D | D | D | E | F | S |   |
| K | S | E | H | A | D | S | D | S | D | T | F | Y |   |
| K | V | E | P | E | E | S | E | S | D | D | V | I |   |
| K | M | T | A | I | D | S | D | D | D | G | V | V |   |
| V | L | E | R | L | D | S | D | L | Q | K | L | E |   |
| P | V | T | R | L | D | S | D | A | G | A | L | F |   |
| E | D | V | R | S | D | S | E | S | D | D | E | H |   |
| E | D | I | R | S | D | S | E | D | D | D | D | D |   |
| I | D | N | D | V | D | S | E | S | V | S | E | A |   |
| A | R | V | D | V | D | S | E | G | T | P | T | P |   |
| I | E | E | H | T | D | S | E | S | G | G | E | T |   |
|   |   |   |   |   | M | E | S | E | G | E | T | A | G |
| S | K | K | Q | S | D | S | E | E | T | S | V | N |   |
| E | H | A | D | S | D | S | D | T | F | Y | I | P |   |
| E | P | E | E | S | E | S | D | D | V | I | I | V |   |
| V | R | S | D | S | E | S | D | D | E | H | E | D |   |

|                  |                                                                        |
|------------------|------------------------------------------------------------------------|
| <b>At5g43310</b> | expressed protein; sim. to COP1-interacting protein 7                  |
| <b>At1g34020</b> | transporter-related (weak similarity to UDP-glucose transporter)       |
| <b>At5g41600</b> | reticulum                                                              |
| <b>At3g03050</b> | putative cellulose synthase catalytic subunit CslD3 (KOJAK)            |
| <b>At5g44290</b> | cdc2-related kinase                                                    |
| <b>At2g27090</b> | putative bZIP                                                          |
| <b>At5g57110</b> | Ca ATPase isoform 8 (ACA 8)                                            |
| <b>At1g19870</b> | unknown protein, contains IQ calmodulin binding motif                  |
| <b>At1g70770</b> | unknown protein                                                        |
| <b>At4g02710</b> | sim. to chromosome condensation ATPases (centromere protein homolog)   |
| <b>At5g41800</b> | proline transporter?                                                   |
| <b>At3g25540</b> | LAG homolog 1 (cont. TLC dom.)                                         |
| <b>At3g19260</b> | longevity factor-like                                                  |
| <b>At2g41705</b> | cont. CRCB-like domain (possibly involved in chromosome condensation?) |
| <b>At4g33700</b> | sim. to Mg/Co transporter; cont. DUF21, CBS domain                     |
| <b>At4g08850</b> | RLK group XII (24 LRRs)                                                |
| <b>At5g05170</b> | CesA3 cellulose synthase catalytic subunit                             |
| <b>At1g57700</b> | cdc2-related kinase                                                    |
| <b>At5g57110</b> | Ca ATPase isoform 8 (ACA 8)                                            |
| <b>At1g19870</b> | unknown protein, contains IQ calmodulin binding motif                  |
| <b>At3g25540</b> | LAG homolog 1 (cont. TLC dom.)                                         |

# [R,K]-x-pS PKA-like sites

|   |   |   |   |   |   |   |   |   |   |   |   |   |
|---|---|---|---|---|---|---|---|---|---|---|---|---|
| P | A | T | P | R | V | S | T | P | E | I | L | T |
| S | E | S | P | R | V | S | T | K | R | D | P | V |
| Q | L | P | C | R | V | S | T | S | D | V | D |   |
| S | T | G | S | R | R | S | I | D | G | G | E | P |
| A | S | N | S | R | L | S | P | L | P | E | P |   |
| V | S | S | S | R | L | S | D | G | S | F | D | N |
| G | N | S | S | R | H | S | F | N | M | F | G | F |
| G | R | S | S | R | L | S | A | D | D | F | I | E |
| I | F | P | E | K | G | S | Y | R | E | L | S | E |
| I | F | P | E | K | G | S | Y | R | E | L | S | E |
| S | T | V | V | K | G | S | F | G | Y | L | D | P |
| D | D | P | S | K | G | S | E | G | Q | T | P | P |
| L | E | L | M | R | E | T | Q | S | V | G | D | E |
| S | S | G | S | R | R | T | Q | S | V | N | N | D |
| P | S | S | A | R | N | S | V | S | S | P | I | M |
| G | S | S | P | R | A | S | V | S | D | N | G | N |
| V | N | V | Y | R | R | S | V | S | F | G | G | I |
| R | E | E | S | R | D | S | D | D | D | E | F | S |
| Q | S | P | S | R | D | S | H | D | G | E | K | T |
| R | D | P | S | R | A | S | L | G | N | E | E | E |
| N | D | R | R | R | W | S | F | D | S | V | S | A |
| D | D | G | L | R | Q | S | S | D | D | P | S | K |
| S | S | R | R | R | Q | S | S | E | I | V | P | E |
| V | A | M | G | R | M | S | R | D | S | A | A | E |
| G | R | M | S | R | D | S | A | A | E | A | S | G |
| N | A | T | G | R | M | S | G | N | L | A | S | A |
| D | G | L | L | K | A | S | A | E | V | L | G | K |
| D | G | L | L | K | A | S | A | E | L | L | G | R |
| N | D | L | L | K | G | S | F | E | L | P | R | G |
| S | S | W | G | R | K | S | G | S | W | D | M | S |
| E | S | W | G | R | R | S | G | S | W | D | V | A |
| N | S | P | G | K | A | S | I | G | S | Q |   |   |
| G | A | P | R | K | I | S | G | P | L | D | Y | S |
| F | H | R | R | K | H | S | W | P | T | E | E | F |
| R | N | T | G | R | V | S | P | A | V | D | P | P |
| K | A | S | K | K | Q | S | D | S | E | E | T | S |
| R | T | E | H | R | R | S | R | S | E | E | N | I |
| H | V | G | T | K | M | S | N | E | L | A | V | P |
| K | S | S | D | R | N | S | G | K | M | M | S | Y |
| T | D | E | Q | K | L | S | M | E | S | M | K | R |
| S | K | E | K | R | L | S | F | V | R | A | W | E |
| Y | H | T | L | R | I | S | F | A | E | L | Q | S |

|                               |                                                                 |
|-------------------------------|-----------------------------------------------------------------|
| <b>At1g47670</b>              | put. Lys/His transporter                                        |
| <b>At1g78610</b>              | putative mechanosensitive ion channel                           |
| <b>At1g80830</b>              | NRAMP metal ion transporter 1 (NRAMP1)                          |
| <b>At3g52710</b>              | hypothetical protein                                            |
| <b>At1g61250</b>              | secretory carrier membrane protein                              |
| <b>At1g59650</b>              | expressed protein (CW14)                                        |
| <b>At2g47000</b>              | P-glycoprotein, putative MDR4                                   |
| <b>At2g41705</b>              | cont. CRCB-like domain (involved in chromosome condensation?)   |
| <b>At4g30190</b>              | H <sup>+</sup> -ATPase 2, plasma membrane-type (AHA 2)          |
| <b>At2g18960</b>              | H <sup>+</sup> -ATPase 1, plasma membrane-type (AHA 1)          |
| <b>multiple</b>               | conserved in At5g28680, At4g39110, ...                          |
| <b>At2g26730</b>              | RLK group LRR III (5 LRRs)                                      |
| <b>At3g51740</b>              | RLK group LRR III (1 LRR)                                       |
| <b>At1g59870</b>              | ABC transporter family protein (PDR8)                           |
| <b>At2g36910</b>              | multidrug resistance P-glycoprotein (pgp1/ MDR1)                |
| <b>At2g45140</b>              | putative VAMP-associated protein                                |
| <b>At2g01980</b>              | probable Na <sup>+</sup> /H <sup>+</sup> antiporter NHX7        |
| <b>At2g27090</b>              | putative bZIP                                                   |
| <b>At1g45688</b>              | expressed protein                                               |
| <b>At5g09960</b>              | putative protein                                                |
| <b>At1g64060</b>              | Atrboh F (respiratory burst oxidase)                            |
| <b>At2g26730</b>              | RLK group LRR III (5 LRRs)                                      |
| <b>At2g16250</b>              | RLK (11 LRRs)                                                   |
| <b>At1g59870</b>              | ABC transporter family protein (PDR8)                           |
| <b>At1g59870</b>              | ABC transporter family protein (PDR8)                           |
| <b>At1g78880</b>              | expressed protein                                               |
| <b>multiple</b>               | conserved in At5g53320, At5g16590, ...                          |
| <b>multiple</b>               | At3g50230 or At5g43020 or At5g67200                             |
| <b>At5g08080</b>              | syntaxin SYP132                                                 |
| <b>At3g18524</b>              | DNA mismatch repair protein MSH2; cont. DHHC zinc finger domain |
| <b>At4g24630</b>              | DHHC-type zinc finger domain-containing protein                 |
| <b>At3g58690</b>              | kinase group extensin                                           |
| <b>At1g78880</b>              | expressed protein                                               |
| <b>At3g24180</b>              | cont. Pfam: DUF608; sim. to bile acid beta-glucosidase          |
| <b>At1g15400 or At1g80180</b> | expressed protein                                               |
| <b>At1g57700</b>              | cdc2-related kinase                                             |
| <b>At3g26490</b>              | unknown protein; cont. NPH3 dom                                 |
| <b>At1g59870</b>              | ABC transporter family protein (PDR8)                           |
| <b>At3g59110</b>              | kinase group TAKL                                               |
| <b>At3g62150</b>              | multidrug resistance P-glycoprotein MDR17                       |
| <b>At3g61260</b>              | remorin                                                         |
| <b>At5g24010</b>              | RLK group CrRLK1L                                               |

# pS-[D,E]

|   |   |   |   |   |   |   |   |   |   |   |   |   |
|---|---|---|---|---|---|---|---|---|---|---|---|---|
| A | G | I | Q | N | Q | S | D | L | S | D | D | D |
| V | G | E | D | I | R | S | D | S | E | D | D | D |
| Q | K | E | D | S | N | S | D | Y | D | Y | G | N |
| Q | K | L | G | A | A | S | D | S | D | D | N | E |
| N | D | P | E | Y | N | S | D | S | Q | S | Q | A |
| A | N | S | D | T | N | S | D | T | E | S | I | A |
| K | Q | D | N | S | G | T | E | S | D | A | D | D |
| V | N | S | G | T | G | T | D | D | D | A | N | E |
| C | F | R | R | D | G | S | E | S | P | S | S | E |
| F | I | S | P | F | P | S | D | R | F | V | S | P |
| G | S | P | N | P | V | S | D |   |   |   |   |   |
| A | S | P | G | P | L | S | D |   |   |   |   |   |
| S | N | G | S | P | V | S | D | R | A | G | L | Q |
| D | D | P | S | K | G | S | E | G | Q | T | P | P |
| D | G | L | R | Q | S | S | D | D | P | S | K | G |
| T | I | K | E | V | L | S | D | V | D | S | D | N |
| A | P | I | R | V | L | S | D | V | P | K | E | N |
| T | R | K | R | T | L | S | D | P | F | S | N | G |
| V | S | S | S | R | L | S | D | G | S | F | D | N |
| E | H | R | V | V | F | S | D | R | V | S | S | G |
| S | R | R | R | Q | S | S | E | I | V | P | E | P |
| G | S | Y | R | E | L | S | E | I | A | E | Q | A |
| R | S | L | S | E | I | S | E | V | D | A | V | R |
| E | H | R | R | S | R | S | E | E | N | I | N | L |
| K | A | S | K | K | Q | S | D | S | E | E | T | S |
| V | D | S | E | S | V | S | E | A | G | D | I | G |
| S | V | Q | R | Q | N | S | E | N | V | L | I | D |
| R | N | V | I | V | N | S | D | T | L | G | E | K |
| K | K | T | G | G | N | T | E | T | E | T | E | E |
| N | T | A | D | S | A | T | D | D | D | R | S | R |
| I | H | D | E | S | S | T | D | N | E | R | E | S |
| A | A | R | G | G | I | S | D | E | F | S | R | S |
| R | S | D | S | F | A | S | E | I | I | K | A | P |
| V | S | T | Q | A | A | S | E | R | G | G | V | D |
| S | P | A | S | M | M | S | D | P | E | L | A | D |
| K | P | R | F | N | F | S | D | E | E | K | E | E |
| I | L | R | G | A | N | S | D | T | N | S | D | T |
| Q | N | Q | S | D | L | S | D | D | D | S | K | N |

|           |                                                                         |
|-----------|-------------------------------------------------------------------------|
| At4g05110 | nucleoside transporter ENT6                                             |
| At3g19260 | longevity factor-like                                                   |
| At4g18760 | LRR family                                                              |
| At1g34020 | transporter-related (weak similarity to UDP-glucose transporter)        |
| At3g25070 | RIN 4                                                                   |
| At5g47910 | AtrbohD respiratory burst oxidase protein D                             |
| At5g43310 | expressed protein; sim. to COP1-interacting protein 7                   |
| At5g54380 | RLK group CrRLK1L                                                       |
| At1g25320 | RLK group LRR III (7 LRRs)                                              |
| At2g35350 | PP2C                                                                    |
| At3g02880 | RLK group LRR III (5 LRRs)                                              |
| At5g16590 | RLK group LRR III (5 LRRs)                                              |
| At1g23080 | auxin efflux carrier, putative PIN7                                     |
| At2g26730 | RLK group LRR III (5 LRRs)                                              |
| At2g26730 | RLK group LRR III (5 LRRs)                                              |
| At3g20410 | CPK 9 (calcium-dependent kinase)                                        |
| At3g51850 | CPK 13                                                                  |
| At1g33990 | polyneuridine aldehyde esterase, putative                               |
| At1g59650 | expressed protein (CW14)                                                |
| multiple  | kinase group TAKL (At1g01540 or At4g01330)                              |
| At2g16250 | RLK (11 LRRs)                                                           |
| At4g30190 | H <sup>+</sup> -ATPase 2, plasma membrane-type (AHA 2)                  |
| At1g56230 | unknown protein                                                         |
| At3g26490 | unknown protein; cont. NPH3 dom                                         |
| At1g57700 | cdc2-related kinase                                                     |
| At2g41705 | cont. CRCB-like domain (possibly involved in chromosome condensation?)  |
| At5g61740 | ABC transporter ATH14                                                   |
| At4g00340 | RLK group SD-2                                                          |
| At4g27500 | proton pump interactor                                                  |
| At5g49720 | cellulase KORRIGAN                                                      |
| At5g45420 | put. Myb family protein; cont. 2TM, 2 SANT                              |
| At2g37050 | RLK group LRR I (2 LRRs)                                                |
| At3g53380 | RLK L-lectin group                                                      |
| At5g05170 | CesA3 cellulose synthase catalytic subunit                              |
| At5g02620 | ankyrin - like protein                                                  |
| At3g28850 | weak sim. to SH3-binding, Glu-rich protein and put. peptide transporter |
| At5g47910 | AtrbohD respiratory burst oxidase protein D                             |
| At4g05110 | nucleoside transporter ENT6                                             |

# pS-P MAPK/ cdc2-like sites

|   |   |   |   |   |   |   |   |   |   |   |   |   |                        |                                                                 |
|---|---|---|---|---|---|---|---|---|---|---|---|---|------------------------|-----------------------------------------------------------------|
| S | K | V | D | V | E | S | P | A | V | L | A | P | At2g45820              | remorin                                                         |
| V | M | L | D | V | Y | S | P | D | R | L | A | G | At5g10020              | RLK group LRR III (no LRR)                                      |
| I | A | L | E | S | E | S | P | A | K | V | T | T | At3g61260              | remorin                                                         |
| S | N | R | S | V | G | S | P | A | P | V | T | P | At5g12080              | putative mechanosensitive ion channel                           |
| H | F | S | K | S | A | S | P | A | S | V | I | K | At2g02480              | DNAPol III gamma-like                                           |
| N | L | R | A | D | E | S | P | E | K | V | T | V | At3g25070              | RIN 4                                                           |
| L | D | E | Q | E | Q | S | P | E | T | S | E | N | At1g47330              | sim. to Mg/Co transporter; cont. DUF21                          |
| G | E | F | S | A | A | S | P | E | R | L | S | V | At5g05170              | CesA3 cellulose synthase catalytic subunit                      |
| V | S | R | S | P | A | S | P | G | P | L | S | D | At5g16590              | RLK group LRR III (5 LRRs)                                      |
| R | R | D | G | S | E | S | P | S | S | E | N | L | At1g25320              | RLK group LRR III (7 LRRs)                                      |
| S | A | S | V | L | E | S | P | D | I | E | N | G | At3g54030              | kinase group RLCK II (PlantsP annotation); cont. C-term. TPR    |
| D | G | S | S | L | D | S | P | A | E | T | R | S | At5g18610              | kinase group RLCK VII                                           |
| R | S | G | L | F | M | S | P | I | E | R | G | A | At2g35350              | PP2C                                                            |
| N | S | G | S | M | A | S | P | P | V | P | E | G | At2g28070              | ABC transporter WBC3                                            |
| F | E | D | Q | P | G | S | P | E | S | L | A | T | At1g27460              | cont. 4 TPR; sim. to <i>Zea Mays</i> MPCBP                      |
| S | L | E | G | V | G | S | P | E | S | S | S | S | At5g13290              | kinase                                                          |
| V | W | G | S | N | G | S | P | V | S | D | R | A | At1g23080              | auxin efflux carrier, putative PIN7                             |
| A | S | S | P | A | R | S | P | R | R | P | V | Y | At1g45688              | expressed protein                                               |
| A | S | N | S | R | L | S | P | L | P | P | E | P | At1g61250              | secretory carrier membrane protein                              |
| R | N | T | G | R | V | S | P | A | V | D | P | P | At1g15400 or At1g80180 | expressed protein                                               |
| P | A | V | D | P | P | S | P | R | L | S | A | F | At1g15400 or At1g80180 | expressed protein                                               |
| A | T | P | R | V | S | T | P | E | I | L | T | P | At1g47670              | put. Lys/His transporter                                        |
| A | P | S | A | S | S | T | P | E | S | Y | S | K | At4g01410              | harpin-induced protein 1 family (HIN1)                          |
| K | P | V | S | A | S | S | P | E | K | A | I | L | At3g61670              | unknown protein; cont. coiled-coil dom.                         |
| S | Y | V | N | E | Y | S | P | S | A | V | K | A | At3g17840              | RLK group LRR III (5 LRRs)                                      |
| E | P | D | Q | I | L | S | P | R | R | S | L | E | At1g57990              | put. purine permease                                            |
| A | S | A | A | I | A | T | P | P | I | S | K | E | At1g01540              | TAK1 (kinase group TAKL)                                        |
| E | S | A | L | L | K | S | P | S | P | D | N | N | At1g19870              | unknown protein, contains IQ calmodulin binding motif           |
| L | P | K | I | Q | N | S | P | D | N | P | T | S | At2g27060              | RLK group LRR III (16 LRRs)                                     |
| G | E | L | G | E | L | S | P | D | I | R | A | T | At3g18524              | DNA mismatch repair protein MSH2; cont. DHHC zinc finger domain |
| N | I | A | G | G | S | S | P | T | I | Q | S | N | At2g01210              | RLK group LRR III (7 LRRs)                                      |
| P | V | Y | Y | V | Q | S | P | S | R | D | S | H | At1g45688              | expressed protein                                               |
| G | R | S | Y | T | P | S | P | P | R | G | Y | G | At1g55310 or At3g13570 | arginine/serine-rich splicing factor SCL30a or 33               |
| E | I | R | V | E | Q | S | P | V | G | E | D | F | At2g36570              | RLK group LRR III (5 LRRs)                                      |
| S | T | F | I | S | I | S | P | S | M | S | P | K | At3g25500              | formin homology 2 (FH2) domain-containing protein               |
| H | T | M | V | Y | R | S | P | Q | M | K | R | V | At5g37900              | putative protein; TRAF domain-like & C2H2 zinc finger           |
